# Supplementary material for: One-step fabrication of a stretchable and anti-oil-fouling nanofiber membrane for solar steam generation
Source: Royal Society of Chemistry journal article supplement (doi:10.1039/d1qm00101a), 2021-01-01
Supplement: d1qm00101a1.pdf [file d1qm00101a1.pdf]

## Supplementary data

### **One-step fabrication of stretchable and anti-oil-fouling nanofiber membrane for solar steam generation**

Mantang He<sup>a</sup>, Huijie Liu<sup>a</sup>, Liming Wang<sup>a,\*</sup>, Xiaohong Qin<sup>a,\*</sup>, Jianyong Yu<sup>b</sup>

<sup>a</sup> *Key Laboratory of Textile Science & Technology, Ministry of Education, College of Textiles, Donghua University, Shanghai 201620, China*

<sup>b</sup> *Innovation Center for Textile Science and Technology, Donghua University, Shanghai 201620, China*

\* Corresponding authors.

E-mail addresses: wangliming@dhu.edu.cn (L. Wang), xhqin@dhu.edu.cn (X. Qin)

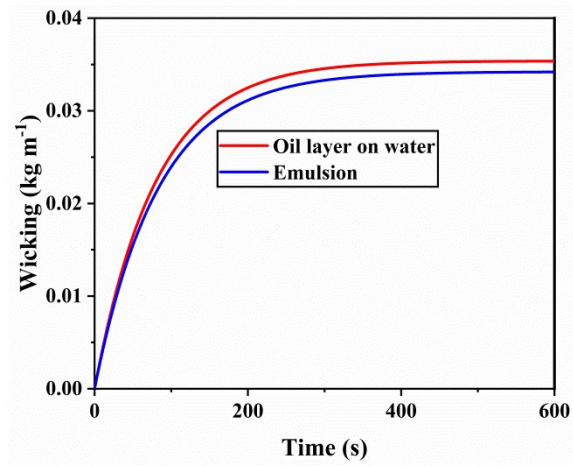

**Fig. S1.** Wicking measurements of PDA@CNT/PU nanofiber membrane in oil layer on water and oil-in-water emulsion.

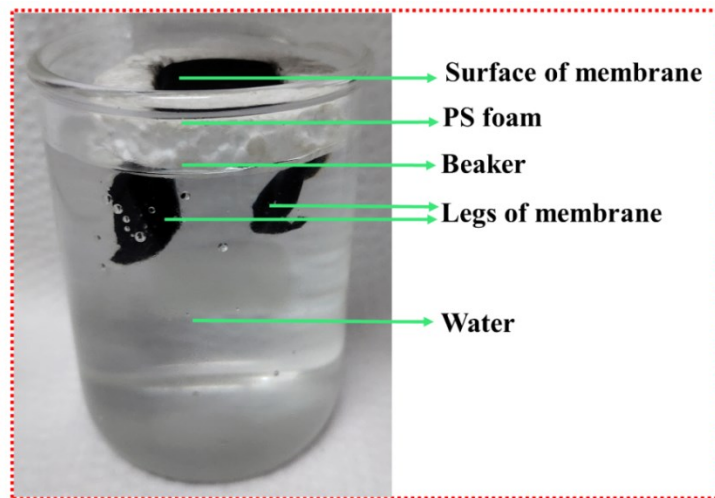

**Fig. S2.** Digital photograph of fabricated device for solar steam generation test.

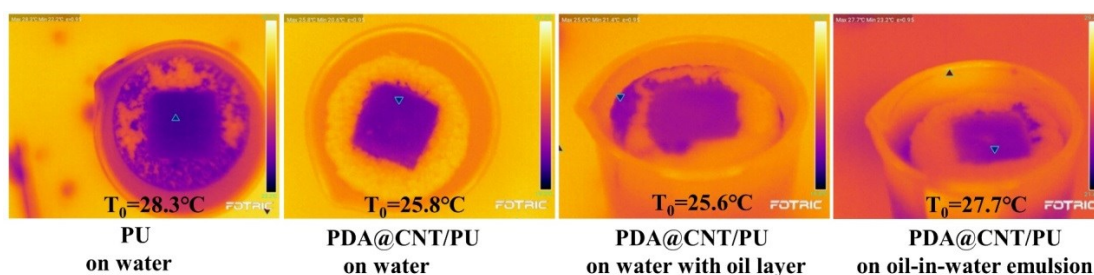

**Fig. S3.** IR images of PU nanofiber membrane on water, and PDA@CNT/PU nanofiber membrane on water, water with oil layer and oil-in-water emulsion before 1 sun illumination.

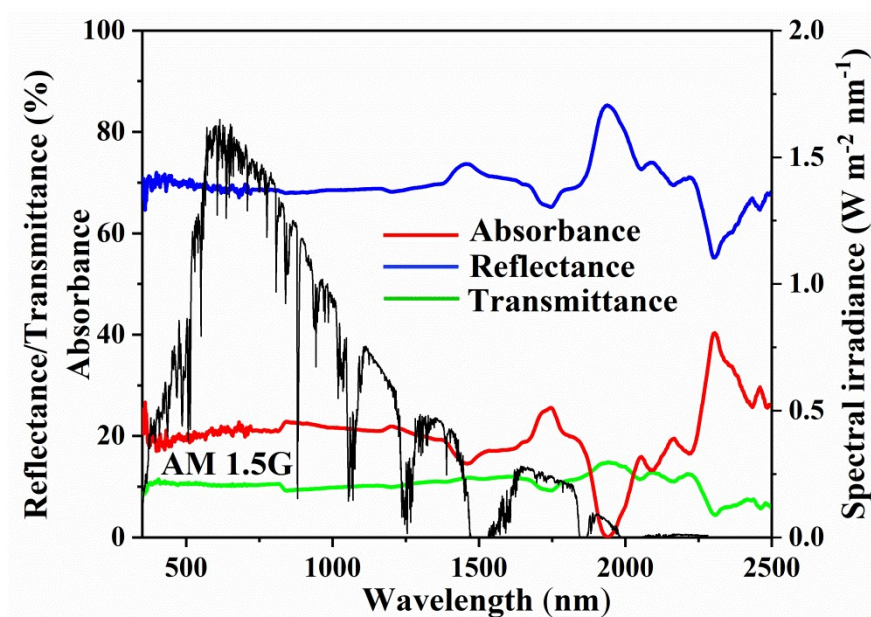

**Fig. S4.** Light absorption spectrum of PDA@CNT/PU nanofiber membrane.

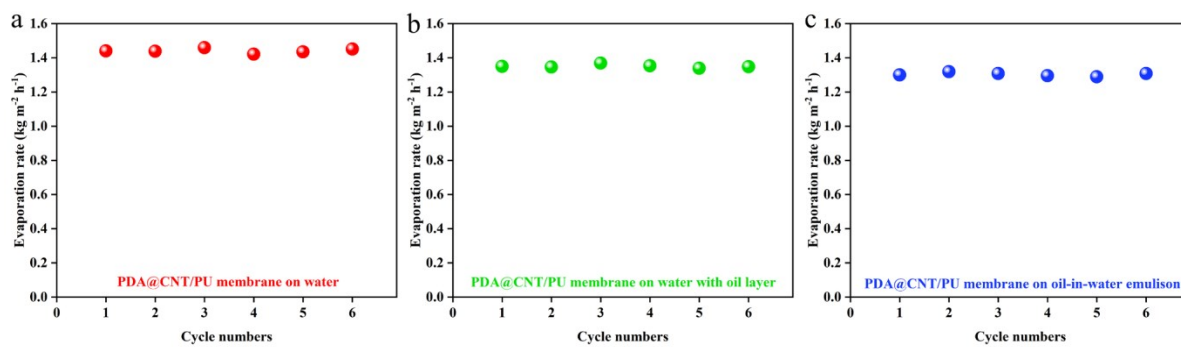

Fig. S5. Evaporation rate of PDA@CNT/PU nanofiber membrane under cycle numbers of test.

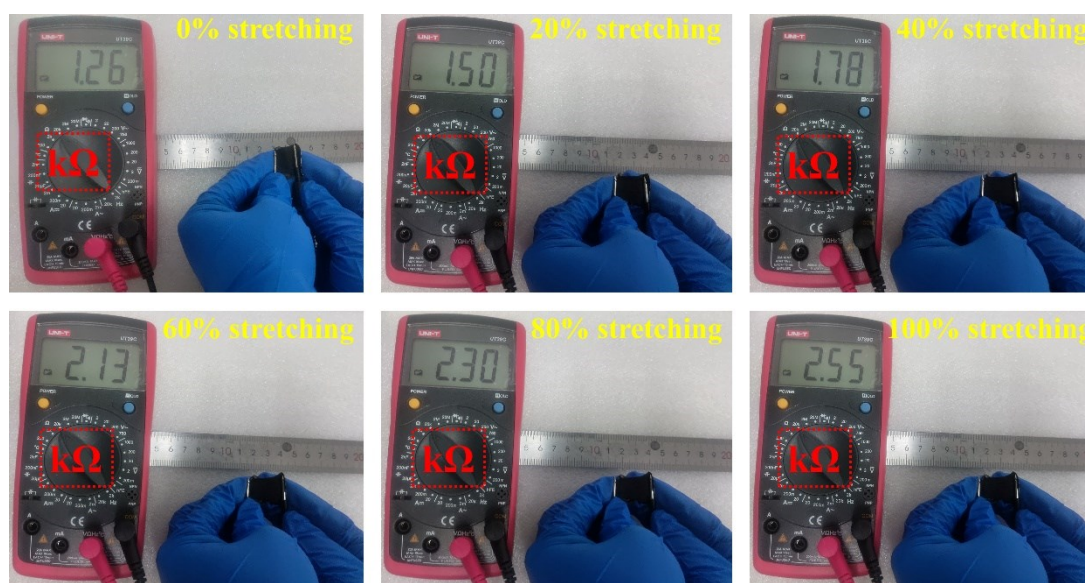

Fig. S6. Resistance of PDA@CNT/PU nanofiber membrane under different strain.

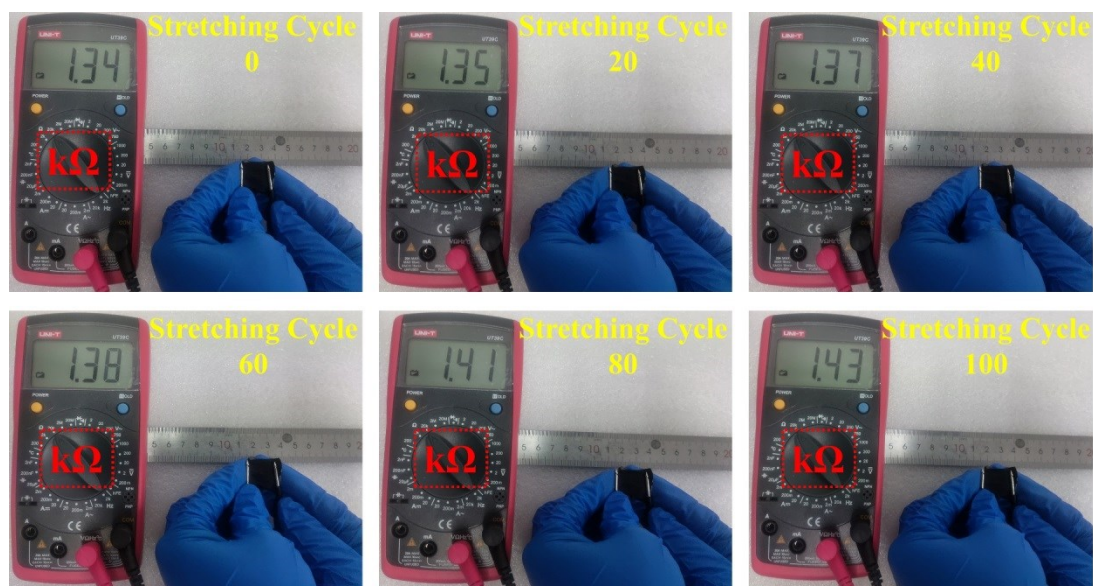

**Fig. S7.** Resistance of PDA@CNT/PU nanofiber membrane after different uniaxial stretching cycle under strain of 100%.
